# Supplementary material for: A Meta-Analysis of the Association between Gender and Protective Behaviors in Response to Respiratory Epidemics and Pandemics
Source: PubMed Central journal article supplement (PMC5074573; doi:10.1371/journal.pone.0164541), 2016-10-21

Funnel Plot for Non-pharmaceutical Behaviors (k = 59)

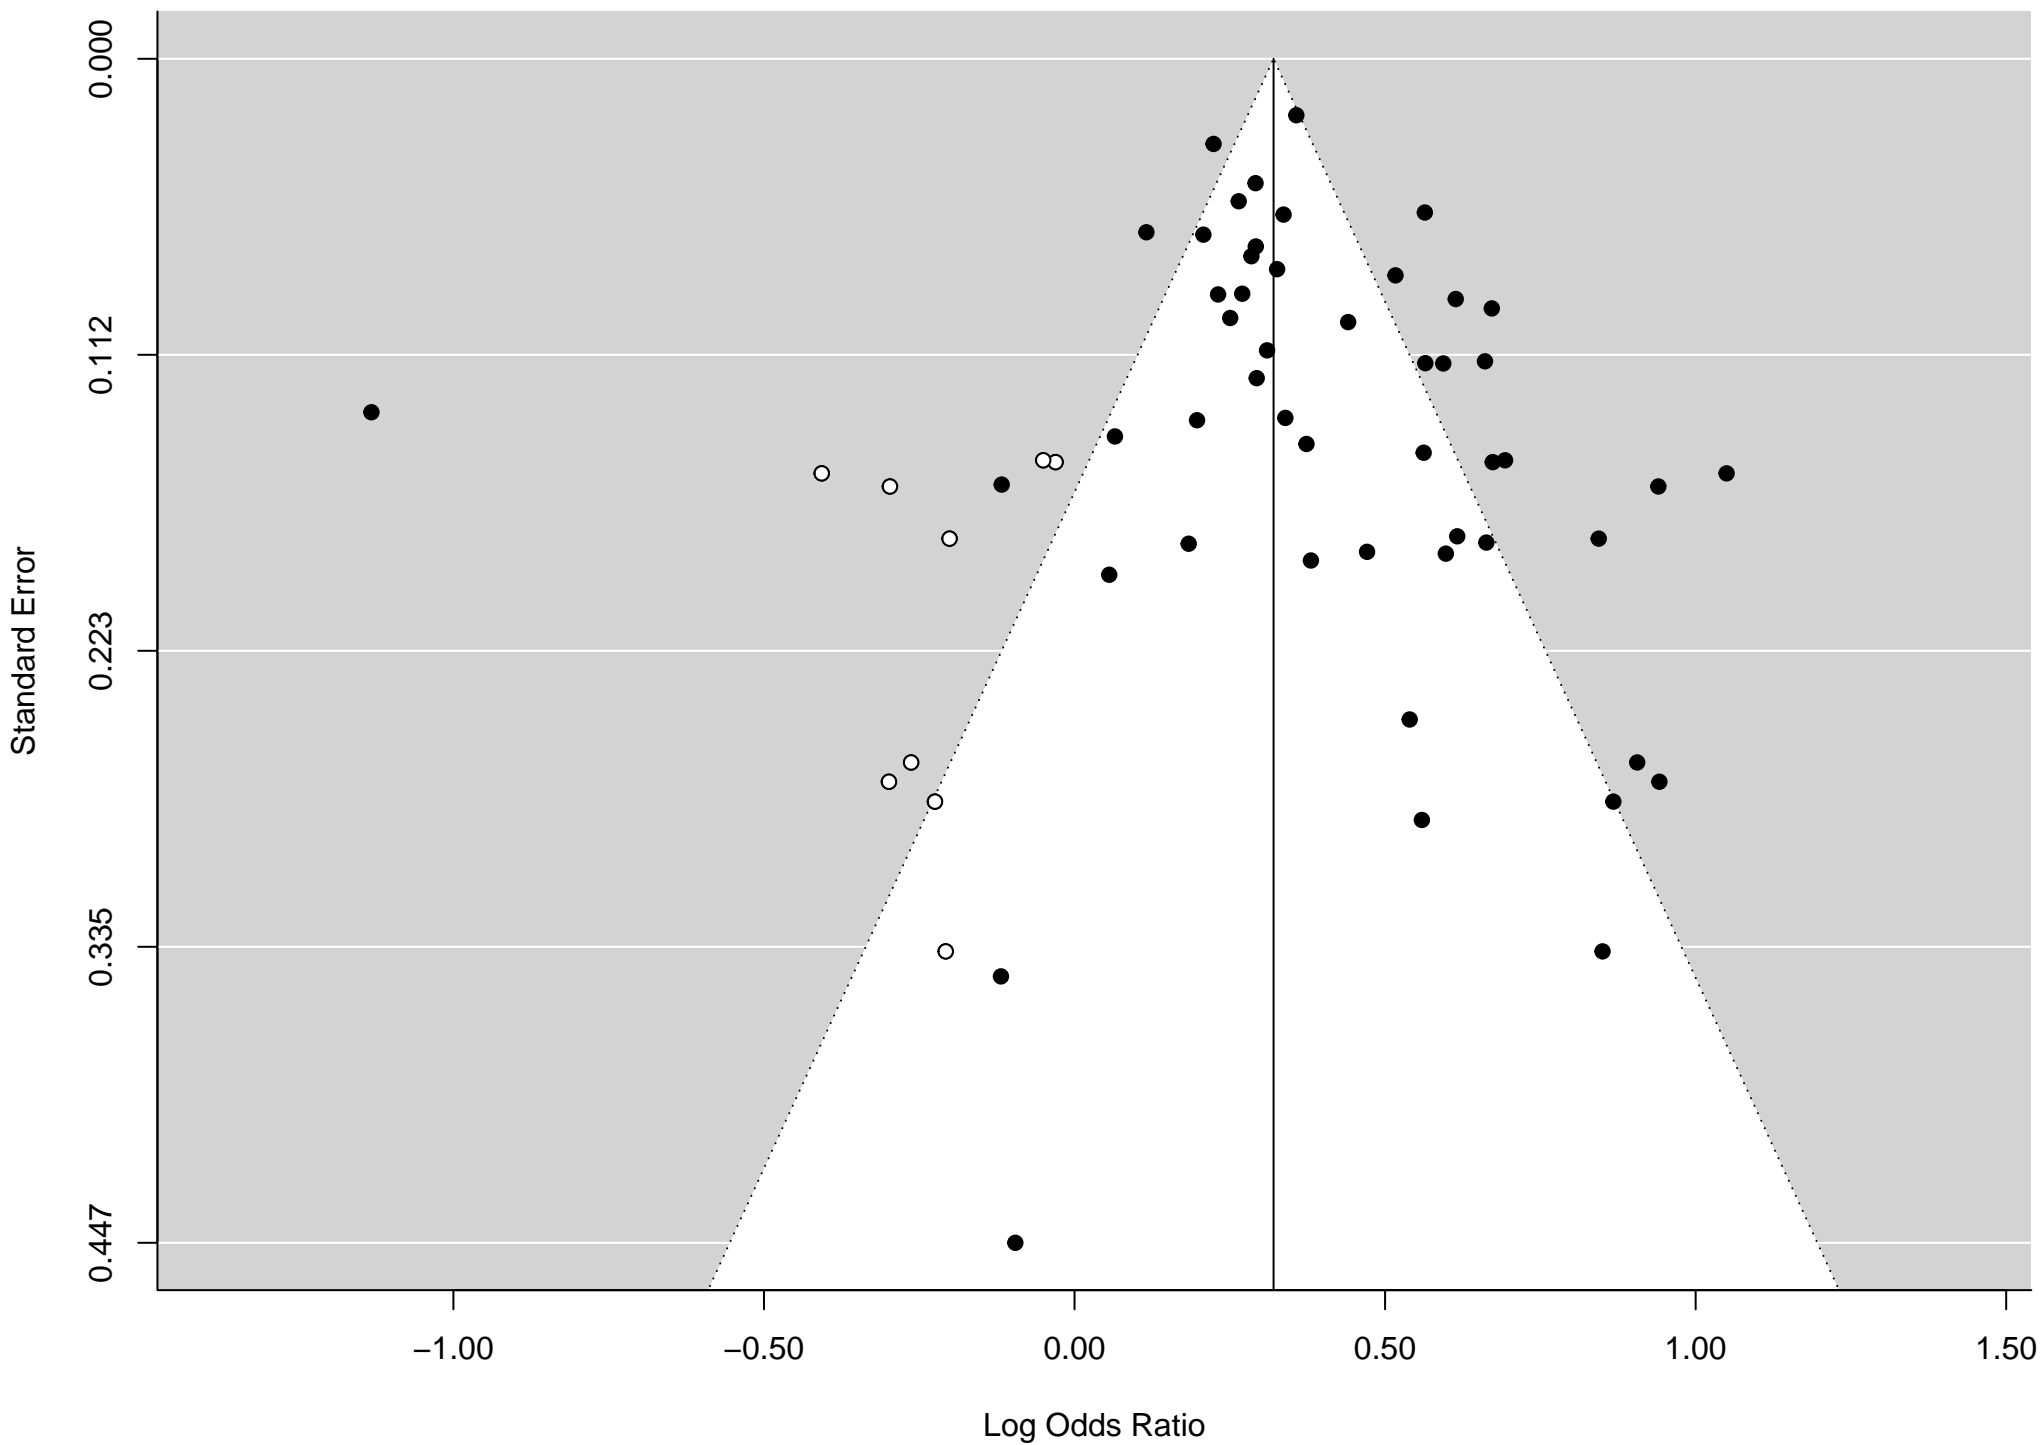

Funnel Plot for Pharmaceutical Behaviors (k = 51)

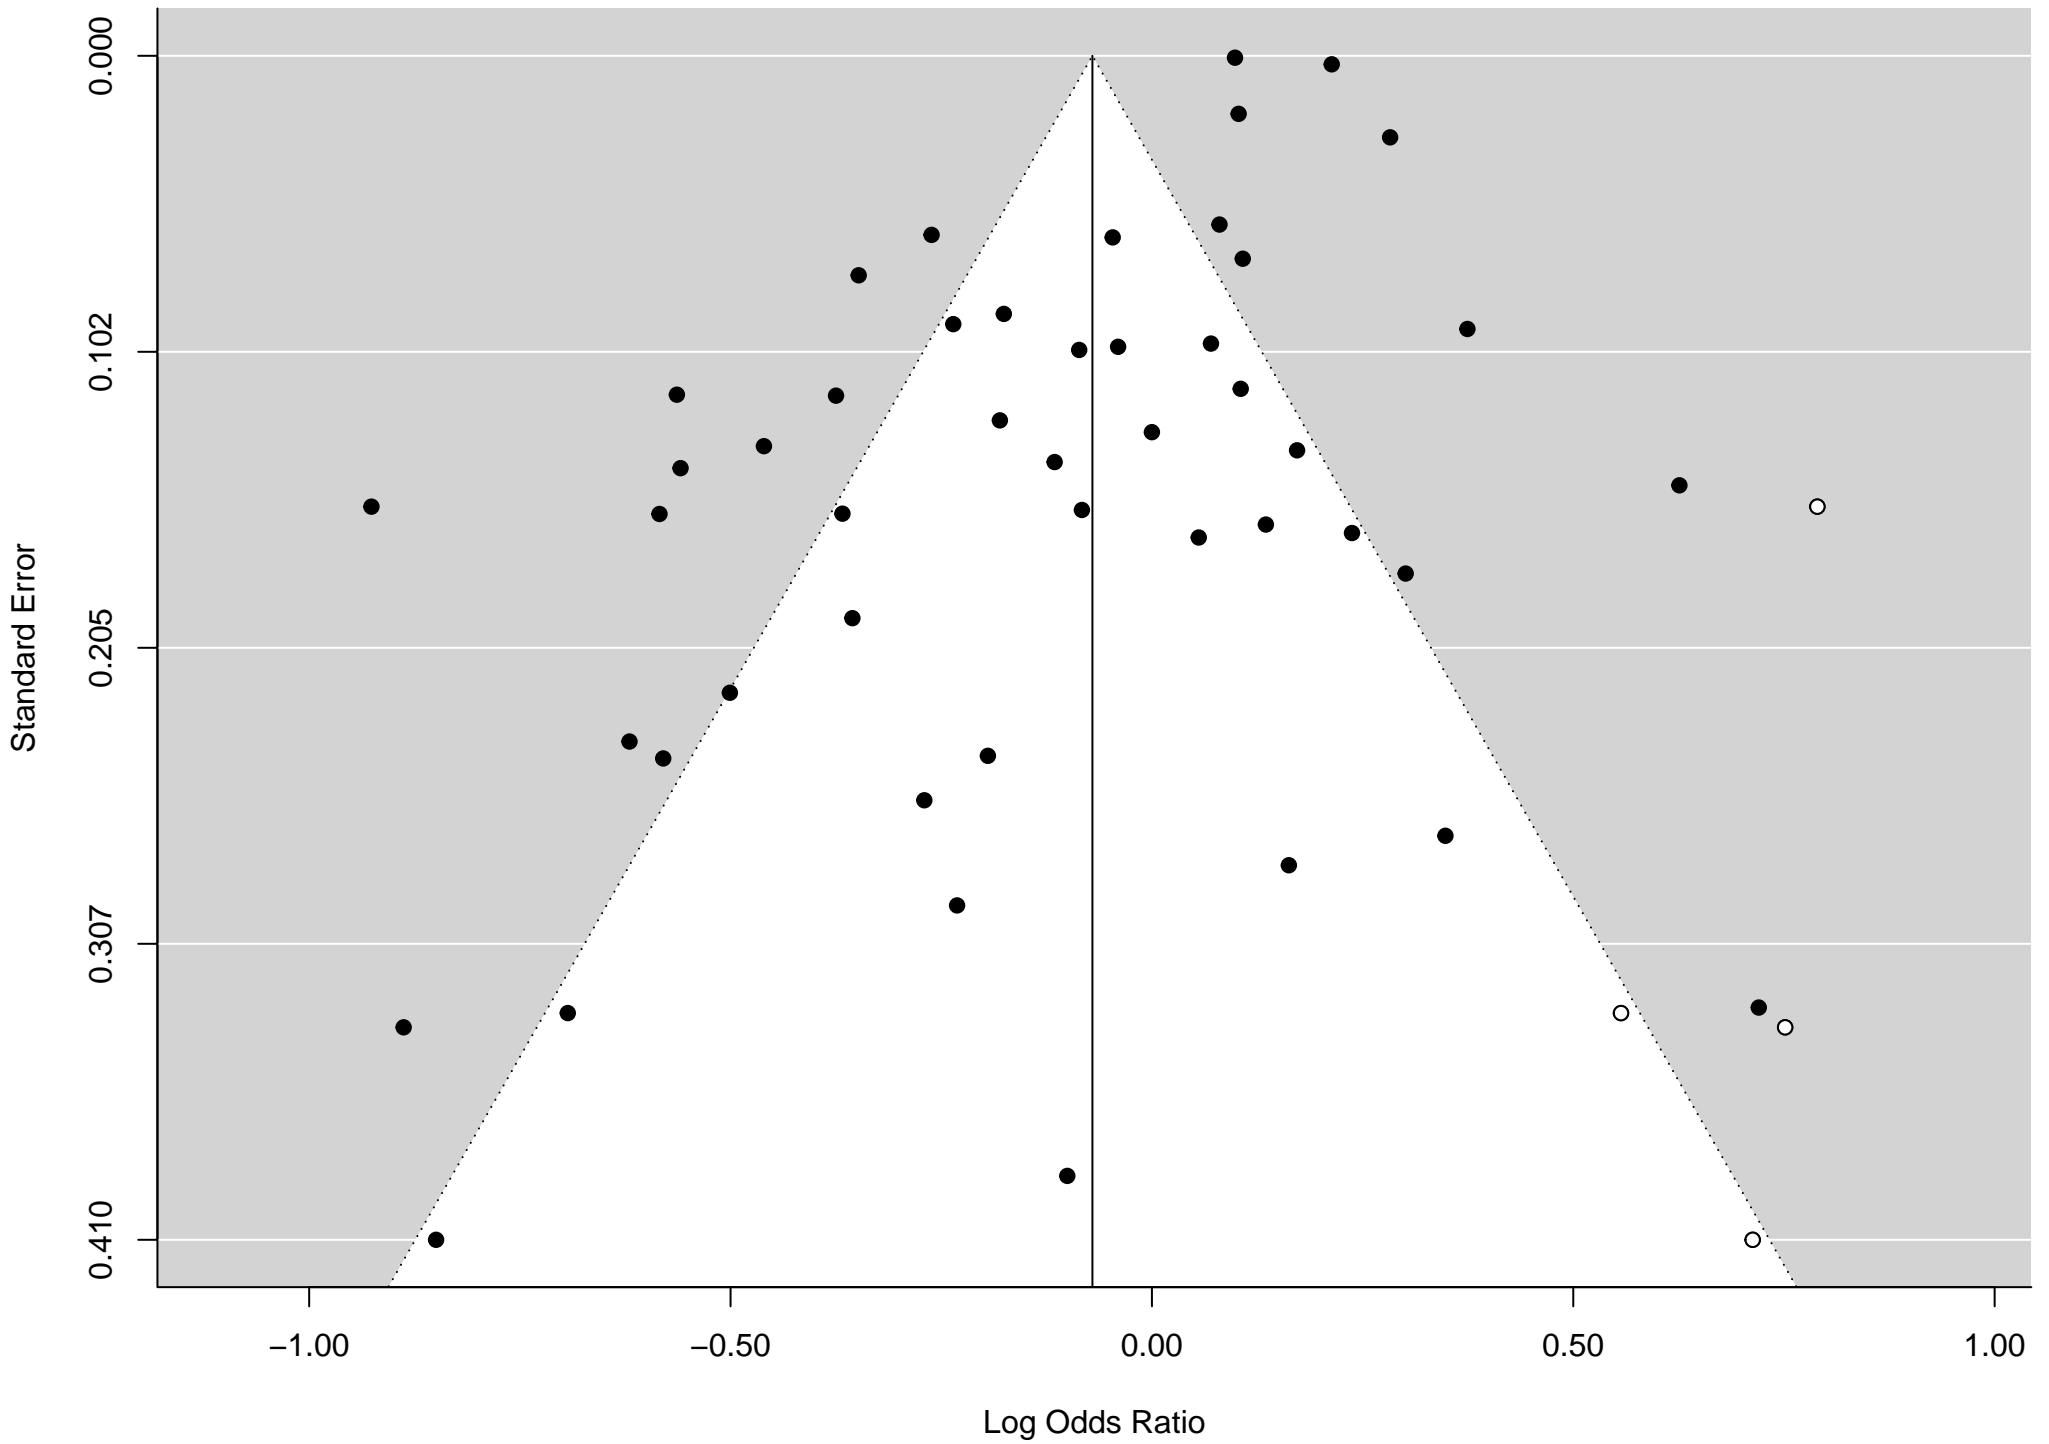

Funnel Plot for All Behaviors (k = 88)

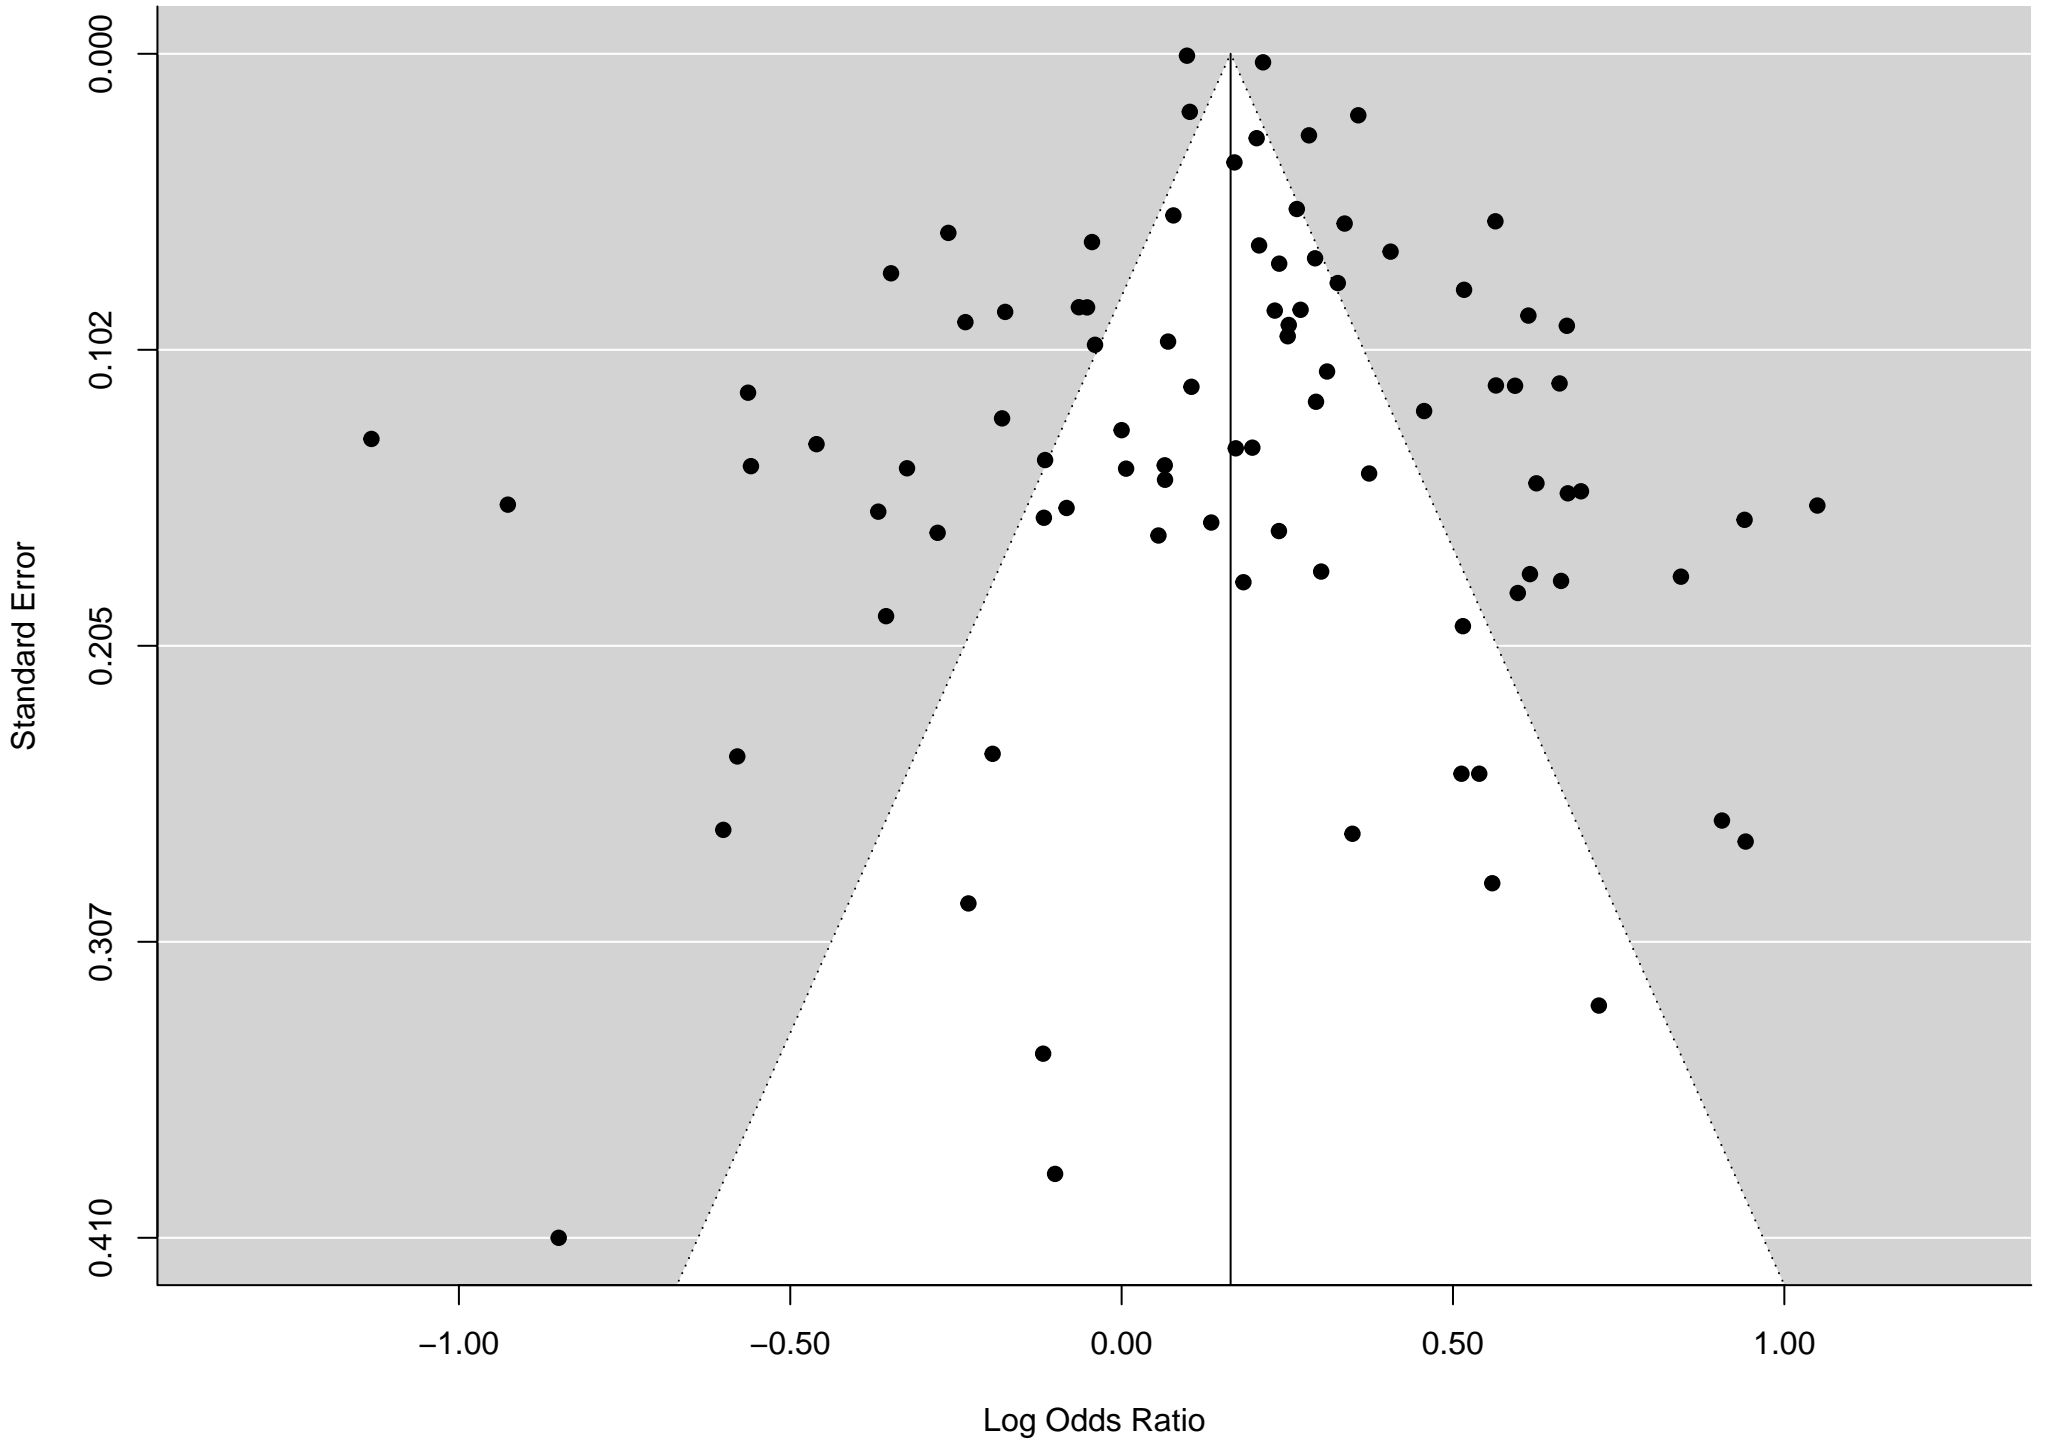

Supplement: pone.0164541.s007.pdf [file pone.0164541.s007.pdf]
